# Supplementary material for: SKESA: strategic k-mer extension for scrupulous assemblies
Source: PubMed Central journal article supplement (PMC6172800; doi:10.1186/s13059-018-1540-z), 2018-10-04

# Supplementary material for SKESA: strategic k-mer extension for scrupulous assemblies

Alexandre Souvorov      Richa Agarwala      David J. Lipman

## Command lines for IDBA and ABySS runs

Defaults were used for IDBA and ABySS except for the number of cores and parameters needed to specify or limit size of k-mers. Command lines for, say, running SRR498276 for IDBA and ABySS using 4 cores are as follows:

```
idba_ud -r SRR498276.reads.fa -o temp_idba --num_threads 4
abyss-pe name=SRR498276 k=64 in=./SRR498276.reads.fa -C temp_abyss -j 4
```

For running IDBA on substrings test set, parameter `--maxk` was set to the length of substrings for runs that had reads with length at most 100 bp and to 100 for the rest. For running ABySS on substrings test set, parameter  $k$  was set to 21 for runs with read lengths in range 22 to 42,  $k$  was set to 32 for runs with read lengths in range 43 to 96, and  $k$  was set to 48 for runs with read lengths longer than 96 bases. Command lines for, say, running substrings with read length 90 for IDBA and ABySS using a single core were:

```
idba_ud -l reads.96.fa -o temp_idba_96 --num_threads 1 --maxk 96
abyss-pe name=reads.96 k=32 se=./reads.96.fa -C temp_abyss_96 -j 1
```

## Tables and Figures with IDBA and ABySS results added

We do not report run time comparison table in the supplementary material as one cannot control memory usage for IDBA and ABySS. In general, time taken by IDBA and ABySS is of the same order as that of SPAdes. Tables 2 through 5 and Figures 1 through 3 of the main manuscript with additional information for IDBA and ABySS included are given below where for each of these tables and figures, the corresponding table or figure number is prefixed by letter ‘S’.

Table S2: Number of misassemblies in 381 inputs in the benchmark set.

| Count  | SKESA | SPAdes | MegaHit | IDBA | ABySS |
|--------|-------|--------|---------|------|-------|
| 0      | 214   | 172    | 128     | 224  | 250   |
| 1      | 83    | 98     | 91      | 76   | 79    |
| 2      | 40    | 43     | 66      | 32   | 26    |
| 3      | 13    | 30     | 30      | 8    | 6     |
| 4      | 9     | 12     | 18      | 11   | 9     |
| 5      | 7     | 7      | 15      | 5    | 8     |
| 6      | 2     | 3      | 10      | 7    | 0     |
| 7      | 2     | 0      | 5       | 1    | 1     |
| 8      | 1     | 1      | 3       | 2    | 0     |
| 9      | 0     | 0      | 2       | 2    | 0     |
| 10+    | 10    | 15     | 13      | 13   | 2     |
| Median | 0     | 1      | 1       | 0    | 0     |

Table S3: Mismatches per 100 Kb as reported by QUASt for benchmark and contamination sets.

| Benchmark set                            |       |        |         |       |       |
|------------------------------------------|-------|--------|---------|-------|-------|
| Measure                                  | SKESA | SPAdes | MegaHit | IDBA  | ABySS |
| Median                                   | 0.08  | 2.76   | 1.89    | 0.45  | 3.79  |
| Maximum                                  | 7.78  | 41.60  | 31.94   | 26.56 | 29.40 |
| Average                                  | 0.40  | 3.21   | 2.79    | 0.98  | 5.17  |
| Assembly counts in benchmark set         |       |        |         |       |       |
| Mismatches range                         | SKESA | SPAdes | MegaHit | IDBA  | ABySS |
| 0                                        | 105   | 1      | 1       | 13    | 3     |
| 0.01 – 1                                 | 247   | 40     | 80      | 267   | 34    |
| 1.01 – 2                                 | 9     | 76     | 121     | 53    | 58    |
| 2.01 – 3                                 | 9     | 89     | 58      | 22    | 51    |
| 3.01 – 4                                 | 1     | 71     | 45      | 11    | 49    |
| > 4                                      | 10    | 104    | 76      | 15    | 186   |
| Mismatches reported in contamination set |       |        |         |       |       |
| Set                                      | SKESA | SPAdes | MegaHit | IDBA  | ABySS |
| No contamination                         | 0     | 1.44   | 3.83    | 1.50  | 5.72  |
| 3x contamination                         | 0     | 1.42   | 3.21    | 1.50  | 5.72  |
| 6x contamination                         | 0     | 1.44   | 3.02    | 1.40  | 5.57  |
| 9x contamination                         | 0.02  | 1.61   | 4.38    | 1.40  | 5.46  |
| 12x contamination                        | 0.02  | 1.52   | 4.96    | 1.11  | 3.77  |
| 15x contamination                        | 0.04  | 1.50   | 5.83    | 1.36  | 3.34  |

Table S4: Deviation of assembly length produced by the assemblers from the assembly length of the reference as computed using aligned length reported by QUASt and assembly lengths for benchmark and contamination sets.

| Benchmark set                  |        |        |         |        |        |
|--------------------------------|--------|--------|---------|--------|--------|
| Measure                        | SKESA  | SPAdes | MegaHit | IDBA   | ABySS  |
| Median                         | 2.72   | 10.91  | 5.59    | 5.99   | 2.98   |
| Maximum                        | 135.75 | 775.14 | 407.78  | 433.23 | 144.61 |
| Average                        | 4.61   | 57.98  | 24.23   | 26.81  | 4.91   |
| Deviation in contamination set |        |        |         |        |        |
| Contamination                  | SKESA  | SPAdes | MegaHit | IDBA   | ABySS  |
| None                           | 1.33   | 1.68   | 1.35    | 1.54   | 0.94   |
| 3x                             | 1.36   | 1.68   | 1.33    | 1.70   | 0.93   |
| 6x                             | 1.33   | 1.68   | 1.30    | 1.68   | 0.96   |
| 9x                             | 1.36   | 1.67   | 1.47    | 1.67   | 1.32   |
| 12x                            | 1.41   | 1.68   | 2.05    | 1.71   | 1.63   |
| 15x                            | 1.44   | 1.68   | 2.96    | 1.71   | 1.86   |

Table S5: Contiguity for benchmark, random, and contamination sets.

| Benchmark set                      |         |         |         |         |         |
|------------------------------------|---------|---------|---------|---------|---------|
| N50 measure                        | SKESA   | SPAdes  | MegaHit | IDBA    | ABYSS   |
| <= 10 Kb                           | 14      | 69      | 19      | 20      | 12      |
| 10001 – 50 Kb                      | 40      | 41      | 46      | 67      | 43      |
| 50001 – 100 Kb                     | 41      | 56      | 67      | 100     | 111     |
| 100001 – 250 Kb                    | 191     | 169     | 197     | 154     | 185     |
| 250001 – 500 Kb                    | 77      | 43      | 48      | 38      | 26      |
| > 500 Kb                           | 18      | 3       | 4       | 2       | 4       |
| Median                             | 170647  | 117340  | 124833  | 101678  | 107730  |
| Minimum                            | 1832    | 364     | 687     | 659     | 2104    |
| Maximum                            | 1197860 | 622367  | 617087  | 617493  | 549807  |
| Average                            | 195141  | 131823  | 146706  | 119363  | 125993  |
| N50 statistic in contamination set |         |         |         |         |         |
| Contamination                      | SKESA   | SPAdes  | MegaHit | IDBA    | ABYSS   |
| None                               | 282763  | 260531  | 202384  | 149607  | 220096  |
| 3x                                 | 282763  | 260531  | 202384  | 149607  | 220096  |
| 6x                                 | 282763  | 260532  | 202384  | 149607  | 220096  |
| 9x                                 | 225630  | 260531  | 151916  | 149607  | 183921  |
| 12x                                | 77455   | 260531  | 107175  | 149607  | 180813  |
| 15x                                | 42440   | 260531  | 65124   | 149607  | 180813  |
| Random set                         |         |         |         |         |         |
| N50 measure                        | SKESA   | SPAdes  | MegaHit | IDBA    | ABYSS   |
| <= 10 Kb                           | 6       | 10      | 6       | 389     | 21      |
| 10001 – 50 Kb                      | 349     | 206     | 285     | 2140    | 1051    |
| 50001 – 100 Kb                     | 788     | 409     | 1516    | 942     | 1730    |
| 100001 – 250 Kb                    | 2307    | 2369    | 2889    | 1420    | 2021    |
| 250001 – 500 Kb                    | 1324    | 1616    | 266     | 82      | 166     |
| > 500 Kb                           | 226     | 390     | 38      | 27      | 11      |
| Median                             | 170877  | 208907  | 117074  | 48953   | 91918.5 |
| Minimum                            | 2414    | 209     | 4182    | 301     | 1747    |
| Maximum                            | 1545488 | 1530182 | 1499532 | 1499368 | 1502369 |
| Average                            | 213847  | 255079  | 136339  | 77447.3 | 103982  |

Figure S1: Number of mismatches per 100 Kb for substring set

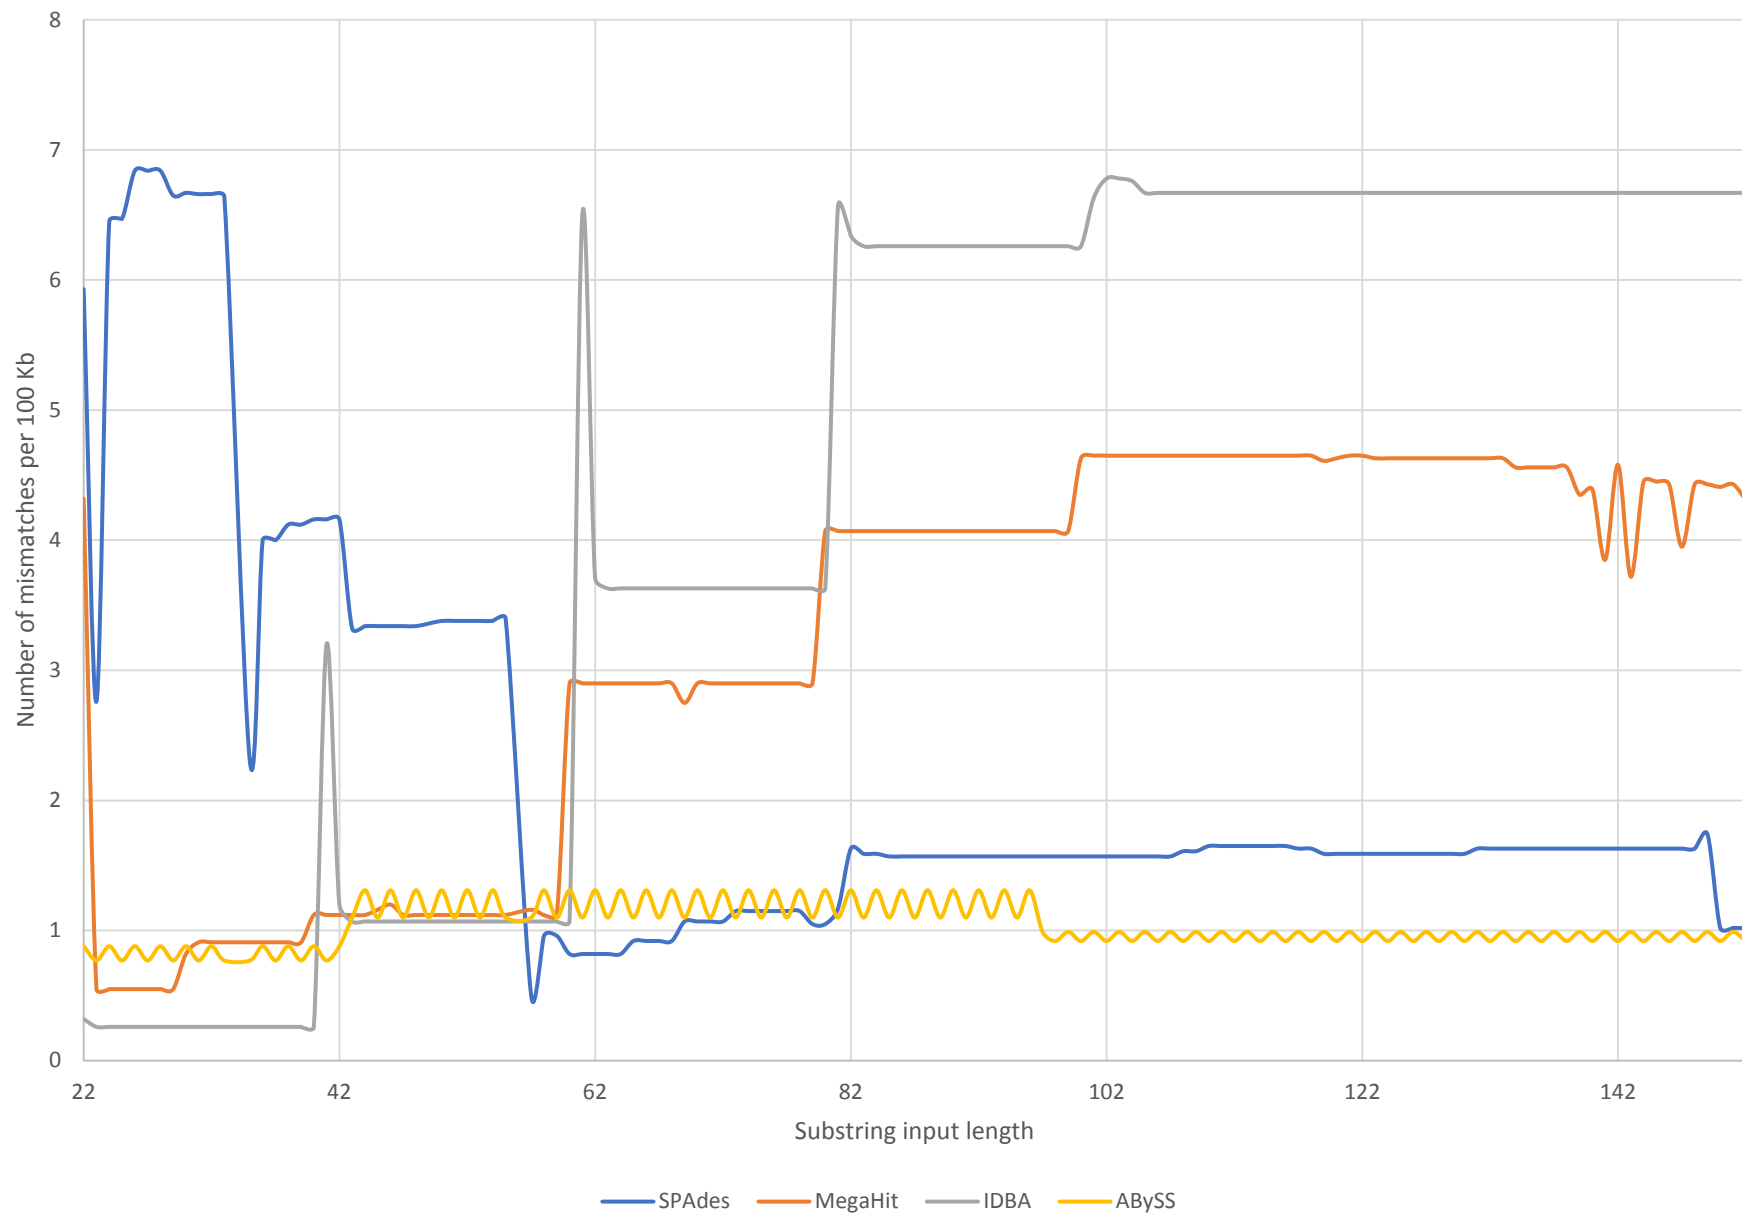

Figure S2: N50 for substrings set

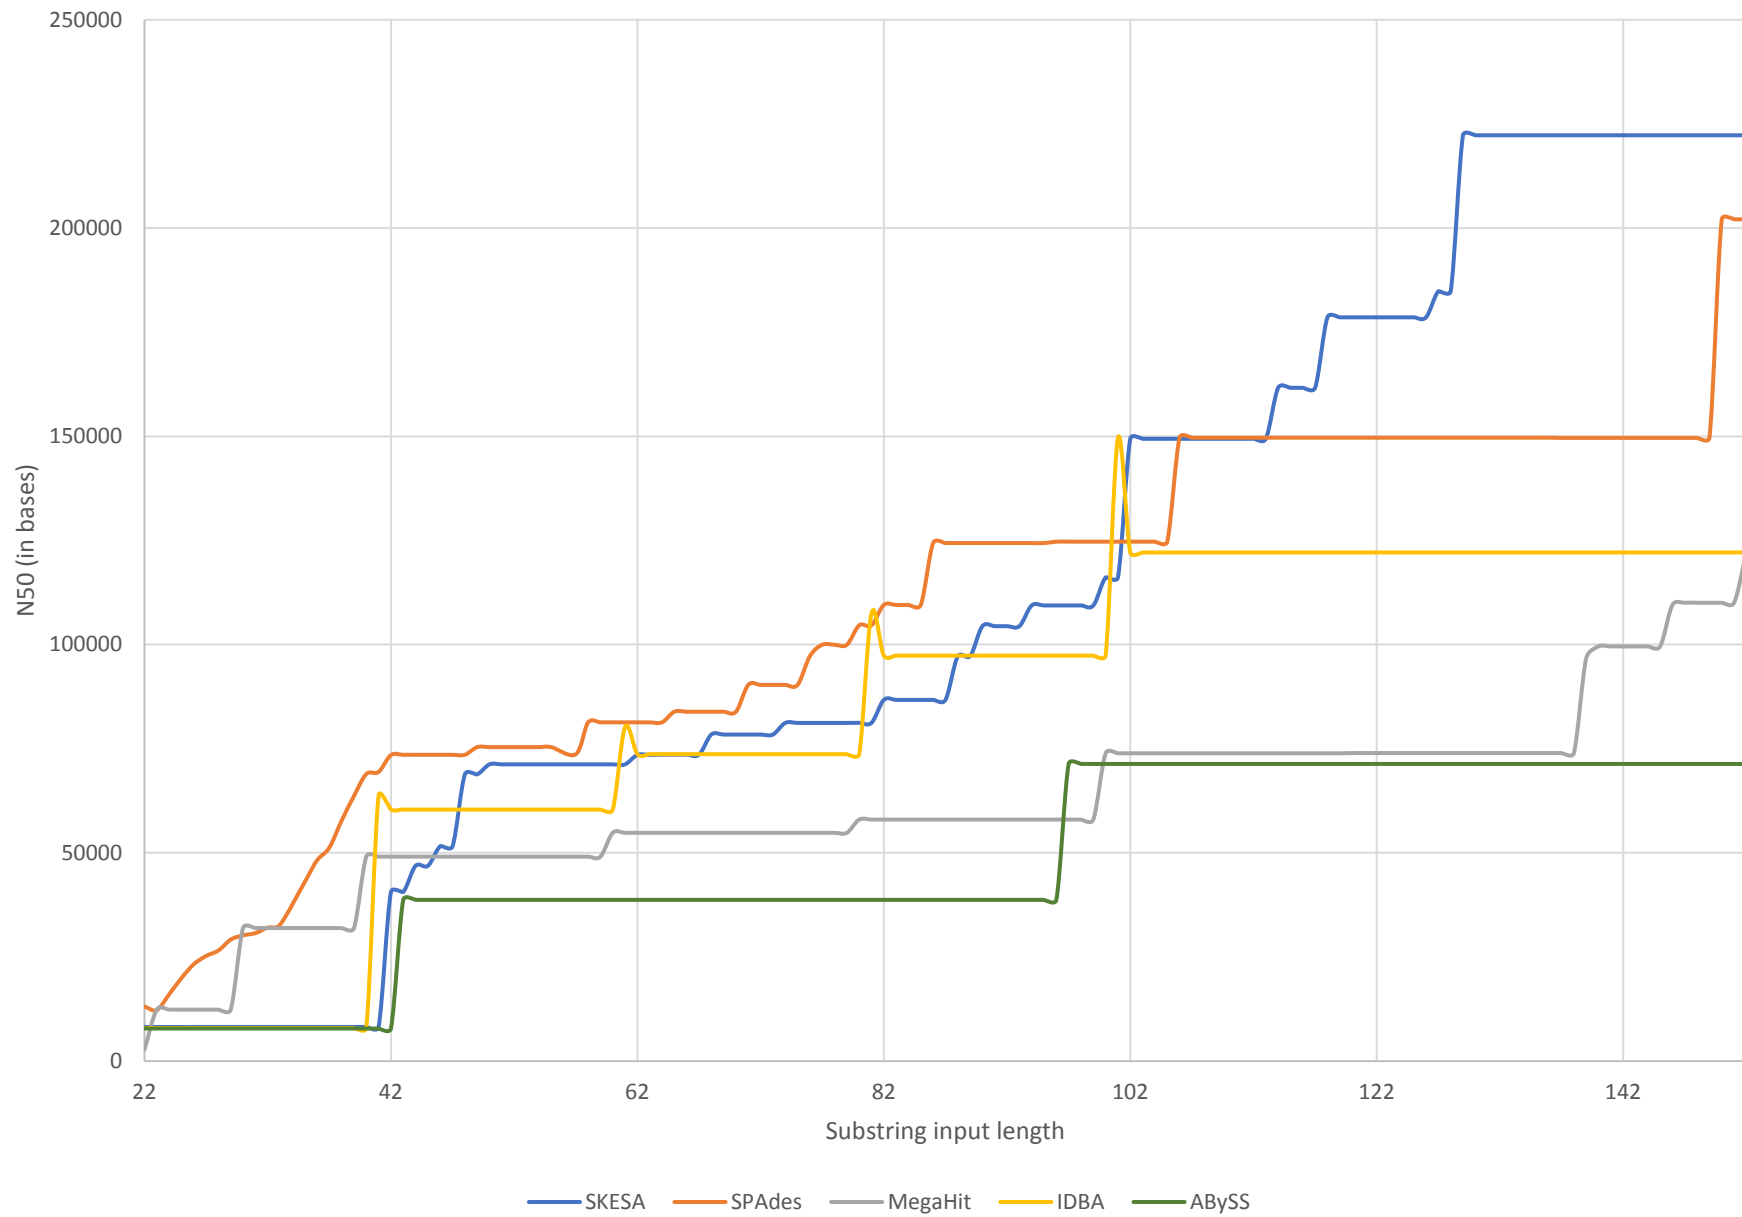

Figure S3: Deviation in assembly length for substring set

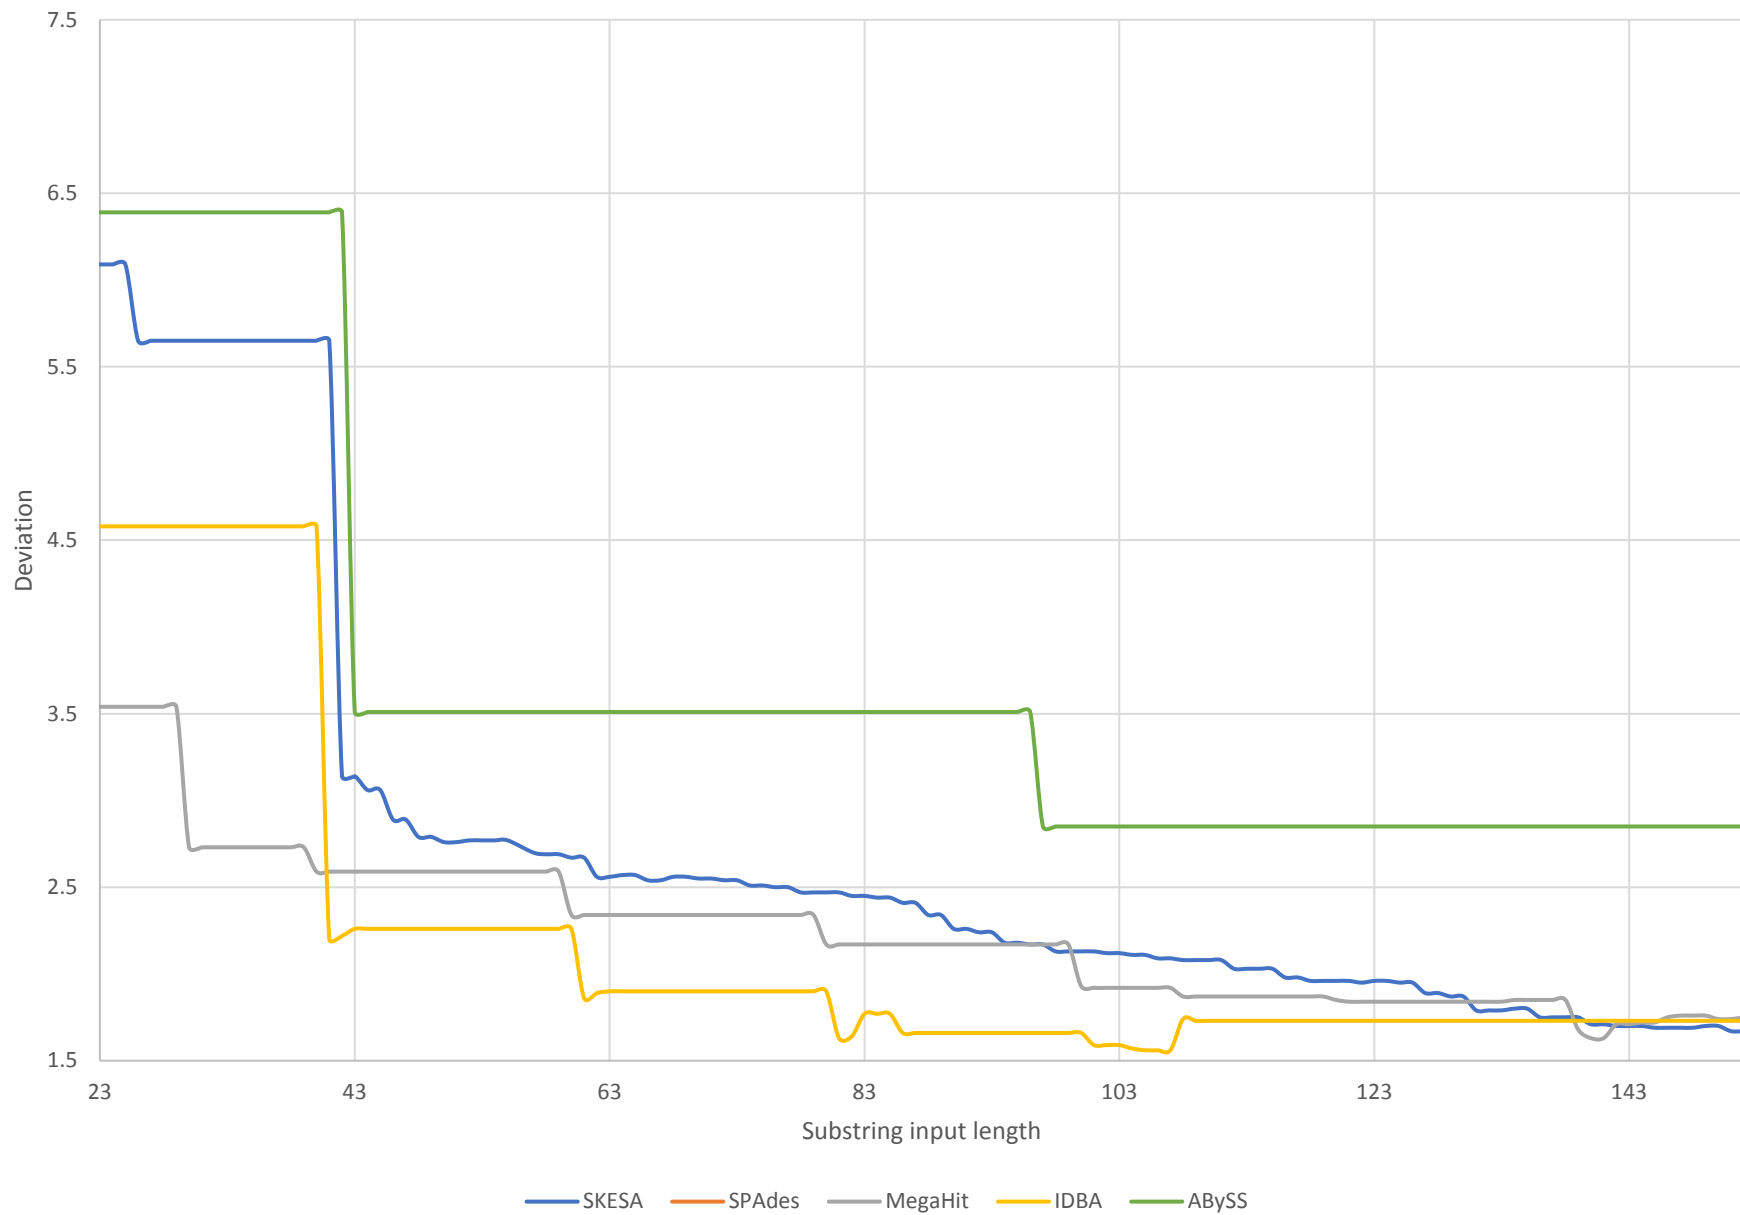

Supplement: 13059_2018_1540_MOESM1_ESM.pdf [file 13059_2018_1540_MOESM1_ESM.pdf]
